# Supplementary material for: Faster, sharper, more precise: Automated Cluster-FLIM in preclinical testing directly identifies the intracellular fate of theranostics in live cells and tissue
Source: PubMed Central journal article supplement (PMC7255044; doi:10.7150/thno.42581), 2020-05-15
Supplement: thnov10p6322s1.pdf [file thnov10p6322s1.pdf]

## Supplementary Material

Faster, sharper, more precise: Automated Cluster-FLIM in preclinical testing directly identifies the intracellular fate of theranostics in live cells and tissue

*Robert Brodwolf<sup>†,Δ</sup>, Pierre Volz-Rakebrand<sup>†,Δ</sup>, Johannes Stellmacher<sup>†,Δ</sup>, Christopher Wolff<sup>∞</sup>, Michael Unbehauen<sup>§</sup>, Rainer Haag<sup>§</sup>, Monika Schäfer-Korting<sup>∞</sup>, Christian Zoschke<sup>∞</sup> and Ulrike Alexiev<sup>\*,†</sup>*

<sup>†</sup> Institute of Experimental Physics, Freie Universität Berlin, Arnimallee 14, 14195 Berlin, Germany

<sup>∞</sup> Institute of Pharmacy (Pharmacology and Toxicology), Freie Universität Berlin, Königin-Luise-Str. 2+4, 14195 Berlin, Germany

<sup>§</sup> Institute of Chemistry and Biochemistry, Freie Universität Berlin, Takustr. 3, 14195 Berlin, Germany

\*Correspondence and requests for materials should be addressed to U.A. (e-mail: [ulrike.alexiev@fu-berlin.de](mailto:ulrike.alexiev@fu-berlin.de))

Δ contributed equally

# Supplementary Material

## Table of Contents

### Supplementary Figures

|                  |               |
|------------------|---------------|
| <b>Figure S1</b> | <b>Page 3</b> |
| <b>Figure S2</b> | <b>Page 4</b> |
| <b>Figure S3</b> | <b>Page 7</b> |

### Tables

|                 |                |
|-----------------|----------------|
| <b>Table S1</b> | <b>Page 9</b>  |
| <b>Table S2</b> | <b>Page 10</b> |
| <b>Table S3</b> | <b>Page 11</b> |

## Supplementary Material

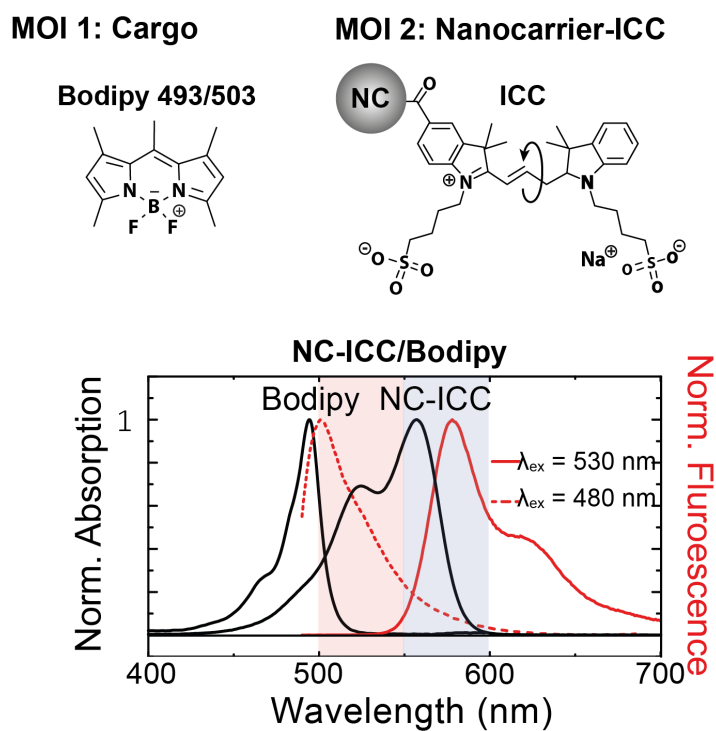

**Figure S1.** Normalized absorption (black) and fluorescence emission (red) spectra of Bodipy (MOI 1) and NC-ICC nanocarrier (MOI 2). Red and blue shaded areas in the spectra indicate the respective spectral range of emission filters used for Bodipy and NC-ICC, respectively. The structures of Bodipy and NC-ICC are shown.

# Supplementary Material

**A**

## Proof of Principle - Simulation of FLIM Data

Input:

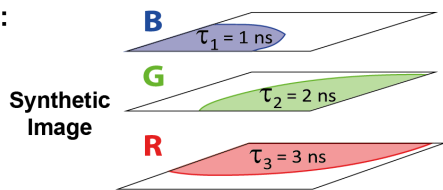

| decay curve # | $\tau_1$ | $\tau_2$ | $\tau_3$ | $\tau_{\text{mean}}$ (ns) |
|---------------|----------|----------|----------|---------------------------|
| 1             | +        |          |          | 1.0                       |
| 2             |          | +        |          | 2.0                       |
| 3             |          |          | +        | 3.0                       |
| 4             | +        | +        |          | 1.5                       |
| 5             |          | +        | +        | 2.5                       |
| 6             | +        |          | +        | 2.0                       |
| 7             | +        | +        | +        | 2.0                       |

Superposition  $\downarrow$  **R + G + B**

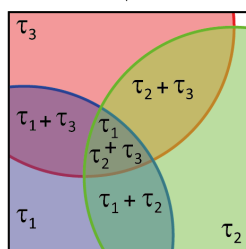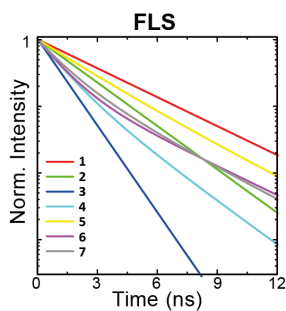

Output:

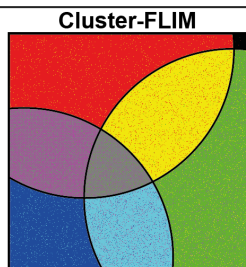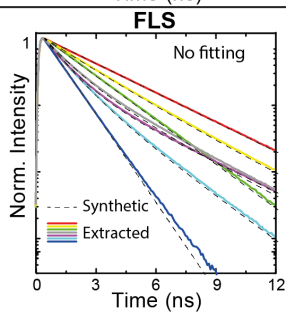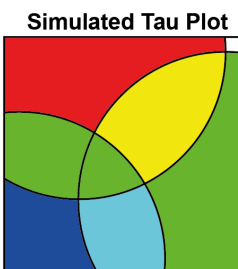

**B**

Real Data

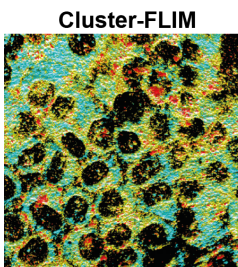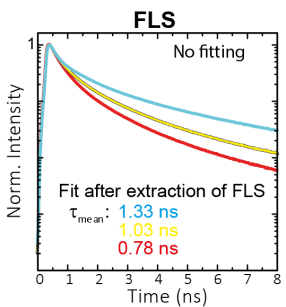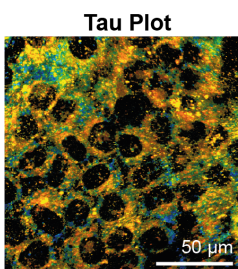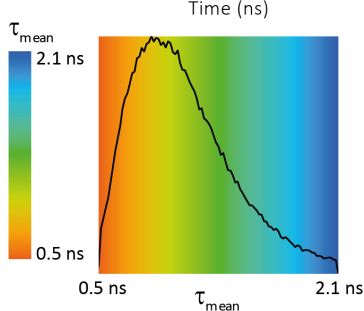

## Supplementary Material

**Figure S2.** Validation of Cluster-FLIM and proof of principle. **(A)** Generation of synthetic FLIM-data and Cluster-FLIM analysis for reliable discrimination of fluorescence decay curves with a high dynamic range. For the “Input“ three layers of simulated FLIM-images (512 x 512 pixel) are generated and superimposed. In each pixel of the three circles monoexponential fluorescence decay traces are simulated with fluorescence lifetimes of  $\tau_1=1$  ns (B: blue),  $\tau_2=2$  ns (G: green) and  $\tau_3=3$  ns (R: red) with an average pixel intensity of 500 counts (cts) and Poisson distributed background noise. As in the experiment the theoretical fluorescence decay curve is convoluted with an IRF (here FWHM  $\sim 170$  ps). In areas of overlapping circles the fluorescence decays traces are super-positions of the individual decays of R,G,B with equi-fractional contributions. This leads to seven different fluorescence decays signatures (including bi- and triexponential decay curves) in the seven areas separated by the colored borders. Note, due to the superposition the pixels with the biexponential decay had an average pixel intensity of 1000 cts, and the pixels with triexponential decays had an average pixel intensity of 1500 cts, but resulting in a mean relative photon number of  $\sim 15\%$  for each area of the 7 areas, with respect to the total photon number in the image. The “Output” of Cluster-FLIM clearly separates the seven FLS and reliably groups pixels with similar fluorescence decays curves in the image, whereas a Tau plot would only find 5 areas because area #2, #6, and #7 share the same mean fluorescence lifetime of 2 ns (see Table in the upper right corner, and green color in simulated tau plot). **(B)** Cluster-FLIM applied to real data (NC-ICC in SCC25 cells). Cluster-FLIM extracts three fluorescence lifetime cluster without the need for fitting the fluorescence lifetime traces. Each cluster is characterized by a unique fluorescence decay characteristics, represented by the FLS. The three extracted FLS are color-coded in cyan, yellow, and red (right). All image pixels belonging to the same cluster share the same decay characteristics and the false-color Cluster-FLIM image (left) is generated assigning a distinct color (corresponding to the FLS color) to all pixels belonging to the same cluster. Thus, the contrast in the Cluster-FLIM image is based on the

## Supplementary Material

fluorescence decay shape in each cluster. Thereby, a high content and high contrast Cluster-FLIM image is generated and reveals the information enhancement compared to a conventional Tau plot.

## Supplementary Material

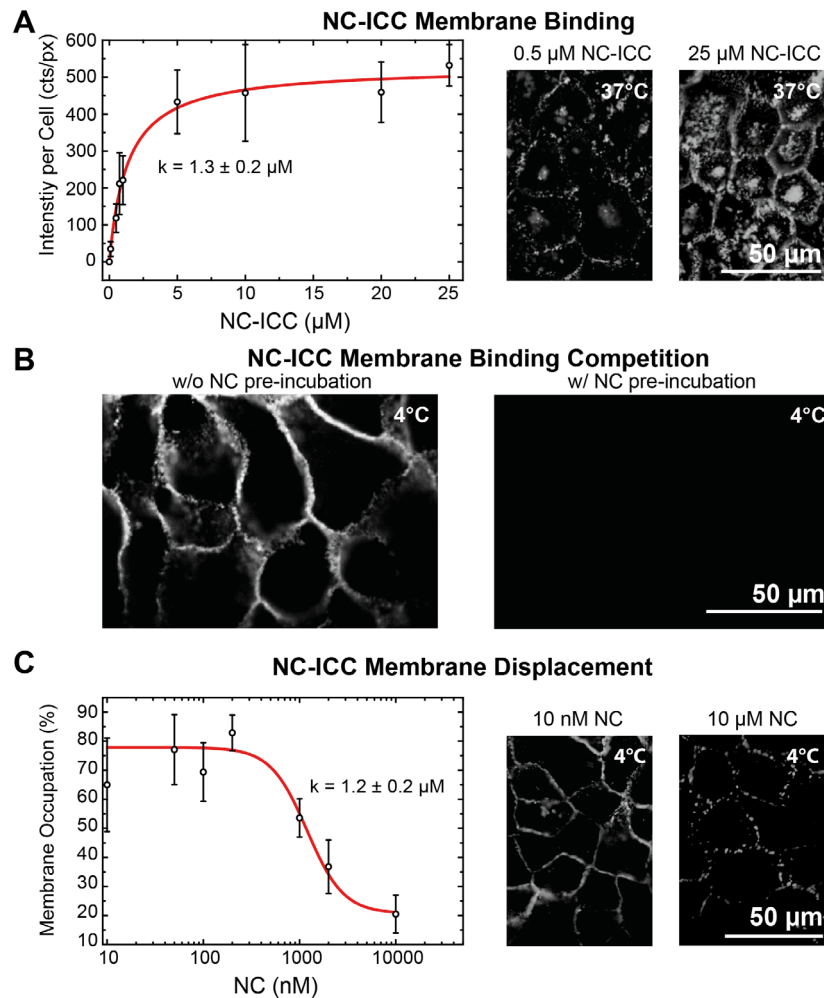

**Figure S3.** NC-ICC membrane interactions. **(A)** Binding of NC-ICC to normal human keratinocyte cell membranes as a function of NC-ICC concentration. The saturation of the NC-ICC binding curve points to a receptor-limited uptake mechanism. The non-linear binding behavior was fitted (equation (13) of main text), yielding a half-maximum uptake concentration (apparent receptor binding affinity) of  $1.3 \pm 0.2 \mu\text{M}$  NC-ICC. Values are mean  $\pm$  SD ( $n=3-6$ ). **(B)** Binding competition of NC-ICC with unlabeled NC. For binding competition keratinocytes were preincubated with 1000  $\mu\text{g/mL}$  (50  $\mu\text{M}$ ) unlabeled NC for 180 min at 4  $^{\circ}\text{C}$ . Binding was performed with 10  $\mu\text{g/mL}$  of NC-ICC without NC preincubation (left) and with NC preincubation (right). **(C)** NC-ICC displacement from keratinocyte cell membranes. NC-ICC (10  $\mu\text{g/mL}$ ,  $\sim 0.5 \mu\text{M}$ ) was incubated in cell medium at 4  $^{\circ}\text{C}$  for 1 h. Afterwards unlabeled NC was added with concentrations ranging from 10 nM to 10  $\mu\text{M}$  at

## Supplementary Material

4 °C. At each NC concentration, the membrane area occupied by NC-ICC was calculated. The decrease of occupied membrane area with increasing NC concentration was fitted by a modified Hill function (equation (14) in main text), yielding a half-maximum binding constant of  $1.2 \pm 0.2 \mu\text{M}$  NC. The decrease in NC-ICC as a function of NC concentration is shown in the two images for 10 nM and 10  $\mu\text{M}$  NC. Experimental conditions: NC-ICC with  $\lambda_{\text{ex}}=530$  nm,  $\lambda_{\text{em}}=545\text{-}600$  nm; objective: 60x water immersion.



## Supplementary Material

**Table S1.** Fit parameters (equation (2) in main text) of the fluorescence decay traces (FLS) of the respective FLIM-clusters obtained by Cluster-FLIM of normal human keratinocytes after incubation with NC-ICC/Bodipy nanocarriers.  $\tau_i$ : fluorescence lifetime of the  $i$ -th decay component in ns,  $\alpha_i$  the corresponding relative amplitude in % (fractional amplitudes  $\beta_i$  shown in brackets),  $\tau_m$ : population weighted mean fluorescence lifetime,  $\tau_{m,a}$ : amplitude weighted mean fluorescence lifetime, and  $\chi^2_{\text{red}}$ : reduced chi square. Since the fluorescence decay traces are generated by integrating over all pixels of a FLIM-image the signal-to-noise is very high and the  $\chi^2_{\text{red}}$  values are above 1. The quality of the fit is also judged from the residuals of the fit. Small deviations in the residuals become apparent at shorter times, probably due to deconvolution with the IRF. As the Cluster-FLIM analysis does not rely on fitting the fluorescence decay traces the fit data are only shown to give an estimate on the mean fluorescence lifetime. Experimental conditions: ICC (autofluorescence, cyan, yellow, and red cluster),  $\lambda_{\text{ex}}=530$  nm,  $\lambda_{\text{em}}=545\text{-}600$  nm; Bodipy (magenta cluster),  $\lambda_{\text{ex}}=488$  nm,  $\lambda_{\text{em}}=500\text{-}550$  nm.

| Decay Species         | $\alpha_1$ (%)<br>( $\beta_1$ %) | $\tau_1$<br>(ns) | $\alpha_2$ (%)<br>( $\beta_2$ %) | $\tau_2$<br>(ns) | $\alpha_3$ (%)<br>( $\beta_3$ %) | $\tau_3$<br>(ns) | $\alpha_4$ (%)<br>( $\beta_4$ %) | $\tau_4$<br>(ns) | $\alpha_5$ (%)<br>( $\beta_5$ %) | $\tau_5$<br>(ns) | $\chi^2_{\text{red}}$ | $\tau_{m,a}$<br>(ns) | $\tau_m$<br>(ns) |
|-----------------------|----------------------------------|------------------|----------------------------------|------------------|----------------------------------|------------------|----------------------------------|------------------|----------------------------------|------------------|-----------------------|----------------------|------------------|
| Autofluorescence      | 56.9<br>(27.4)                   | 0.33             | 23.0<br>(26.2)                   | 0.78             | 17.9<br>(38.1)                   | 1.46             | 1.0<br>(2.9)                     | 2.00             | 1.1<br>(5.5)                     | 3.40             | 1.93                  | 0.69                 | 1.10             |
| Slow (cyan)           | 48.5<br>(22.1)                   | 0.43             | 21.5<br>(24.2)                   | 1.06             | 21.0<br>(33.8)                   | 1.52             | 7.1<br>(13.1)                    | 1.74             | 1.9<br>(6.8)                     | 3.40             | 3.1                   | 0.94                 | 1.33             |
| Intermediate (yellow) | 59.3<br>(33.3)                   | 0.41             | 20.8<br>(25.1)                   | 0.88             | 17.7<br>(35.6)                   | 1.47             | 1.9<br>(4.2)                     | 1.62             | 0.3<br>(1.8)                     | 4.46             | 4.4                   | 0.73                 | 1.03             |
| Fast (red)            | 37.8<br>(18.8)                   | 0.28             | 42.4<br>(39.9)                   | 0.53             | 12.8<br>(23.9)                   | 1.05             | 6.8<br>(16.1)                    | 1.33             | 0.2<br>(1.4)                     | 3.91             | 2.8                   | 0.56                 | 0.78             |
| Bodipy (magenta)      | 9.6<br>(2.9)                     | 1.62             | 90.4<br>(97.1)                   | 5.8              | -                                | -                | -                                | -                | -                                | -                | 3.1                   | 5.40                 | 5.68             |

## Supplementary Material

**Table S2.** Fit parameters (equation (2)) of FLS shown in Figure 2.  $\tau_i$ : fluorescence lifetime of the  $i$ -th decay component in ns,  $\alpha_i$  the corresponding relative amplitude in %.  $\tau_{m,a}$ : amplitude weighted mean fluorescence lifetime, and  $\chi^2$ : reduced chi square. Experimental conditions: ICC,  $\lambda_{ex}=530$  nm,  $\lambda_{em}=545-600$  nm.

|                     | FLS     | $\alpha_1(\%)$ | $\tau_1(\text{ns})$ | $\alpha_2(\%)$ | $\tau_2(\text{ns})$ | $\alpha_3(\%)$ | $\tau_3(\text{ns})$ | $\alpha_4(\%)$ | $\tau_4(\text{ns})$ | $\chi^2_{red}$ | $\tau_{m,a}(\text{ns})$ |
|---------------------|---------|----------------|---------------------|----------------|---------------------|----------------|---------------------|----------------|---------------------|----------------|-------------------------|
| 4 FLS<br>90 cts/px  | Cyan    | 29.4           | 0.67                | 70.2           | 1.56                | 0.4            | 4.98                | -              | -                   | 1.10           | 1.48                    |
|                     | Green   | 53.3           | 0.17                | 27.4           | 0.54                | 14.3           | 1.00                | 5.0            | 1.56                | 1.06           | 0.78                    |
|                     | Magenta | 76.1           | 0.22                | 19.1           | 0.53                | 4.5            | 1.07                | 0.3            | 1.17                | 2.67           | 0.46                    |
|                     | Red     | 94.9           | 0.15                | 4.5            | 0.33                | 0.6            | 0.9                 | -              | -                   | 1.14           | 0.20                    |
| 5 FLS<br>170 cts/px | Cyan    | 34.9           | 0.78                | 64.8           | 1.65                | 0.3            | 6.29                | -              | -                   | 1.39           | 1.53                    |
|                     | Green   | 56.7           | 0.25                | 32.4           | 0.77                | 6.9            | 1.14                | 4.0            | 1.85                | 1.74           | 0.83                    |
|                     | Magenta | 68.5           | 0.19                | 23.8           | 0.43                | 7.2            | 0.87                | 0.5            | 1.76                | 1.34           | 0.46                    |
|                     | Red     | 94.8           | 0.16                | 4.4            | 0.40                | 0.8            | 0.87                | -              | -                   | 1.74           | 0.24                    |
|                     | Yellow  | 56.5           | 0.33                | 29.6           | 0.97                | 13.6           | 2.11                | 0.3            | 4.42                | 1.17           | 1.30                    |

## Supplementary Material

**Table S3.** Inhibition of cellular uptake of NC-ICC nanocarrier towards NHK after 180 min using low temperature, ATP and cholesterol depletion by azide and M $\beta$ CD, respectively. Blocking of caveolin phosphorylation, macropinocytosis (PI3K activity), and clathrin mediated endocytosis was performed by addition of genistein, wortmannin, or chlorpromazine, respectively. Scavenger receptor class A ligands polyinosinic acid and fucoidan were used to inhibit NC-ICC binding to scavenger receptors. Poly C is not a ligand of scavenger receptor and utilized as a positive control. The 37 °C uptake measurement was used as control reference and set to 100%.

| Inhibitor                                        | Concentration  | NC-ICC within NHK<br>(% of control $\pm$ SD) |
|--------------------------------------------------|----------------|----------------------------------------------|
| Low Temperature (4°C)                            | -              | 11 $\pm$ 2                                   |
| Azide                                            | 3 mg/ml        | 0.5 $\pm$ 0.5                                |
| M $\beta$ CD                                     | 5 mg/ml        | 13 $\pm$ 6                                   |
| Genistein                                        | 27 $\mu$ g/ml  | 10 $\pm$ 5                                   |
| Polyinosinic acid (Poly I)                       | 50 $\mu$ g/ml  | 8.6 $\pm$ 2.3                                |
| Polycytidylic acid (PolyC)<br>(positive control) | 50 $\mu$ g/ml  | 98 $\pm$ 14                                  |
| Fucoidan                                         | 100 $\mu$ g/ml | 0.9 $\pm$ 0.7                                |
| Wortmannin                                       | 150 ng/ml      | 105 $\pm$ 25                                 |
| Chlorpromazine                                   | 10 $\mu$ g/ml  | 77 $\pm$ 8                                   |
